# Supplementary material for: Outstanding cycle stability and rate capabilities of the all-solid-state Li–S battery with a Li7P3S11 glass-ceramic electrolyte and a core–shell S@BP2000 nanocomposite
Source: Royal Society of Chemistry journal article supplement (doi:10.1039/c8ta12443d), 2019-01-01
Supplement: c8ta12443d1.pdf [file c8ta12443d1.pdf]

## Electronic Supplementary Information

### Outstanding cycle stability and rate capabilities of the all-solid-state Li-S battery with $\text{Li}_7\text{P}_3\text{S}_{11}$ glass-ceramic electrolyte and core-shell $\text{S@BP2000}$ nanocomposite

Qigao Han,<sup>a</sup> Xuelei Li,<sup>a</sup> Xixi Shi,<sup>a</sup> Hongzhou Zhang,<sup>\*a</sup> Dawei Song,<sup>\*a</sup> Fei Ding,<sup>b</sup> Lianqi Zhang<sup>\*a</sup>

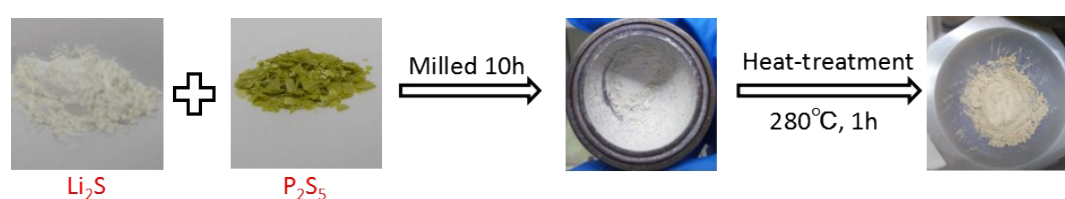

**Fig. S1** Schematic illustration of synthesis process of  $\text{Li}_7\text{P}_3\text{S}_{11}$  glass-ceramic.

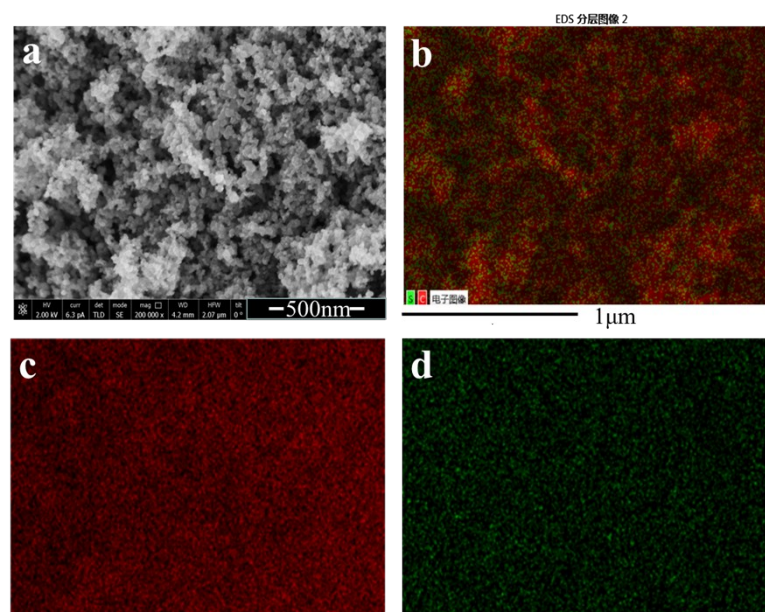

**Fig. S2** (a) SEM image of  $\text{S@BP2000}$  nanocomposite, (b) EDS hierarchical mapping image of C and S elements, EDS mapping images of (c) C and (d) S elements in  $\text{S@BP2000}$  nanocomposite.

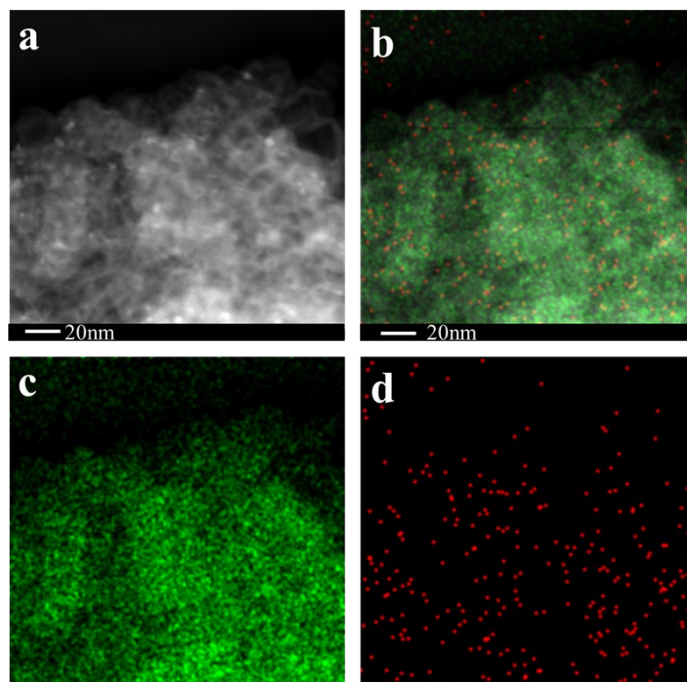

**Fig. S3** (a) TEM image, (b) EDS hierarchical mapping image of C and S elements, EDS mapping image of (c) C and (d) S elements in S@BP2000 nanocomposite.

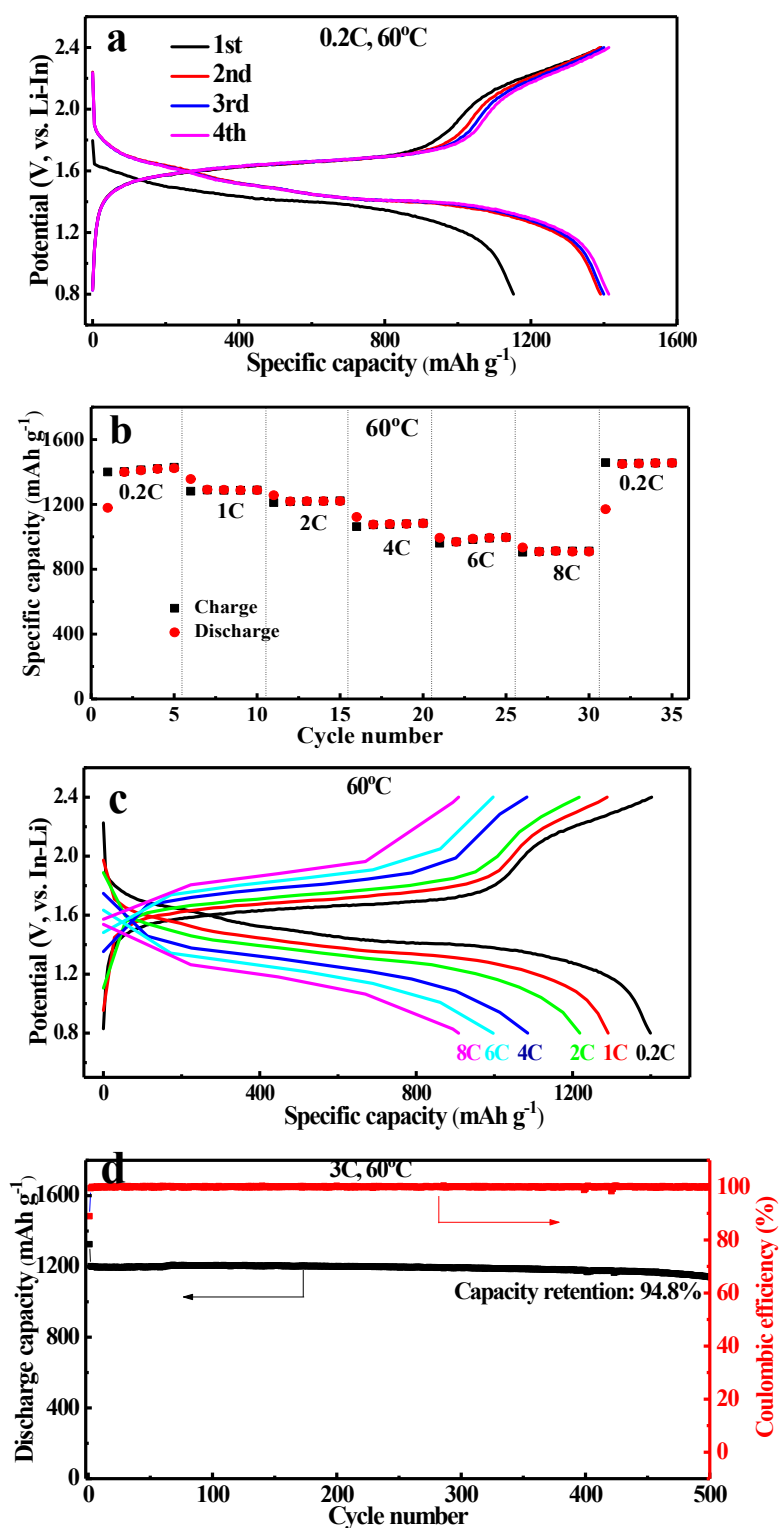

**Fig. S4** Electrochemical performances of S@SBP2000 cathode for ASSLSB in the voltage range of 0.8-2.4 V at 60 °C. (a) Charge-discharge curves under 0.2 C, (b) rate performance curves and (c) charge-discharge curves under various rates from 0.2 C to 8 C, and (d) cycling performance curves. Charge-discharge specific capacity is calculated on the weight of sulfur.
